# Supplementary material for: Place Cell Networks in Pre-weanling Rats Show Associative Memory Properties from the Onset of Exploratory Behavior
Source: PubMed Central journal article supplement (PMC4961032; doi:10.1093/cercor/bhw174), 2016-07-25
Supplement: supp_bhw174_bhw174supp_fig6.pdf [file supp_bhw174_bhw174supp_fig6.pdf]

## Supplemental Figure 6

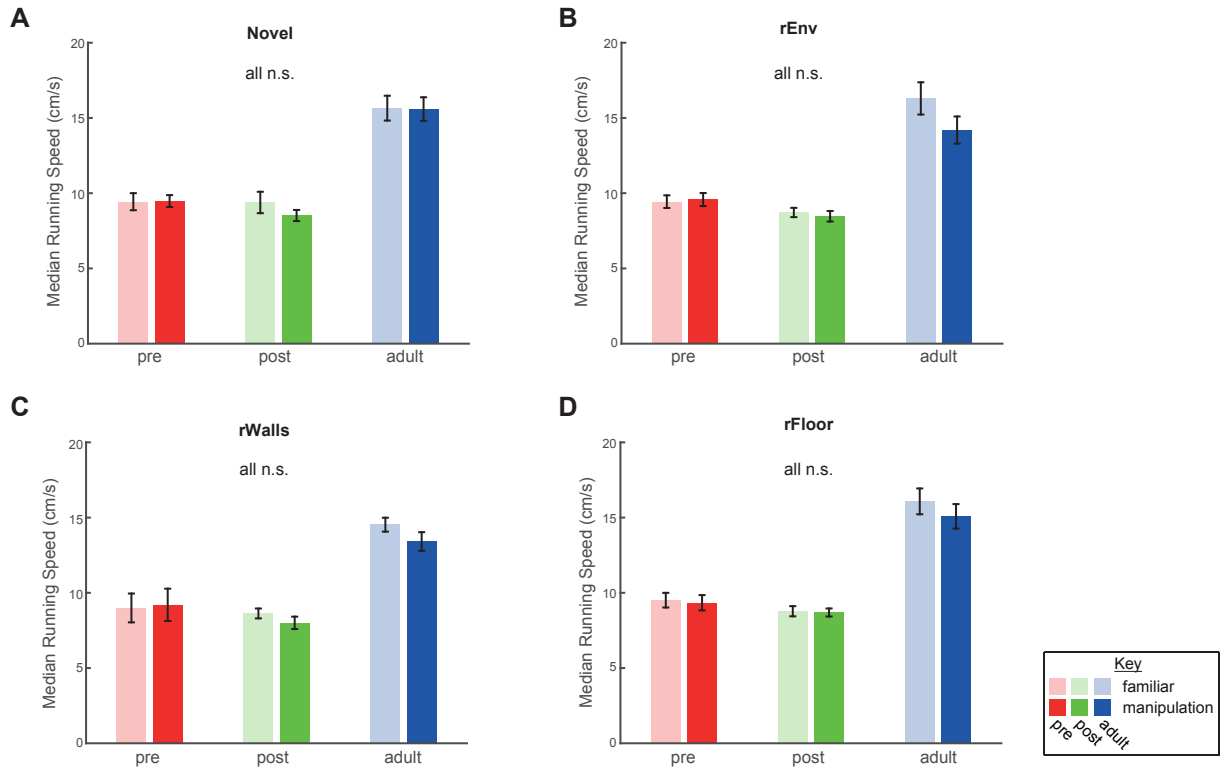

**Supplemental Figure 6.** Average median running speed of animals does not vary between familiar trials and environmental manipulations. Data represents average median running speeds (mean±SEM) across familiar trials (pale colours) as well as manipulation trials (bold colours).

(A) Familiar vs. Novel environment (ANOVA, Age x Trial Type: Age,  $F_{2,66}=64.6$ ,  $p<0.001$ ; Trial,  $F_{1,66}=0.34$ ,  $p=0.56$ ; Age x Trial,  $F_{2,66}=0.33$ ,  $p=0.72$ ). (B) Familiar vs. 'rEnv' (ANOVA, Age x Trial Type: Age,  $F_{2,68}=60.4$ ,  $p<0.001$ ; Trial,  $F_{1,68}=2.36$ ,  $p=0.13$ ; Age x Trial,  $F_{2,68}=1.87$ ,  $p=0.16$ ). (C) Familiar vs. 'rWalls' (ANOVA, Age x Trial Type: Age,  $F_{2,28}=19.35$ ,  $p<0.001$ ; Trial,  $F_{1,28}=0.52$ ,  $p=0.48$ ; Age x Trial,  $F_{2,28}=0.31$ ,  $p=0.74$ ). (D) Familiar vs. 'rFloor' (ANOVA, Age x Trial Type: Age,  $F_{2,60}=74.9$ ,  $p<0.001$ ; Trial,  $F_{1,60}=0.74$ ,  $p=0.39$ ; Age x Trial,  $F_{2,60}=0.34$ ,  $p=0.72$ ).
