# Supplementary material for: Place Cell Networks in Pre-weanling Rats Show Associative Memory Properties from the Onset of Exploratory Behavior
Source: PubMed Central journal article supplement (PMC4961032; doi:10.1093/cercor/bhw174), 2016-07-25
Supplement: supp_bhw174_bhw174supp_table4.pdf [file supp_bhw174_bhw174supp_table4.pdf]

**Supplemental Table 4**

**A**

| Figure/Panel   | Environment  | Measure | Statistical Test | Effect      | Statistic                 | p      | Post-Hoc             |                      |                    |        |
|----------------|--------------|---------|------------------|-------------|---------------------------|--------|----------------------|----------------------|--------------------|--------|
|                |              |         |                  |             |                           |        | Pre                  | Post                 | Adult              |        |
| 1B             | novel        | SC      | 2x3-ANOVA        | Age         | F <sub>2,496</sub> =42.01 | <0.001 | SME(Env)             | <0.001               | <0.001             | <0.001 |
|                |              |         |                  | Environment | F <sub>1,496</sub> =533.6 | <0.001 |                      |                      |                    |        |
|                |              |         |                  | Interaction | F <sub>2,496</sub> =27.49 | <0.001 |                      |                      |                    |        |
| 1B inset       | novel        | SC      | T-Test           | Environment | t(91)=8.35                | <0.001 |                      |                      |                    |        |
| 1D             | novel        | RO      | 2x3-ANOVA        | Age         | F <sub>2,535</sub> =1.85  | 0.16   | SME(Env)             | <0.001               | <0.001             | <0.001 |
|                |              |         |                  | Environment | F <sub>1,535</sub> =130.4 | <0.001 |                      |                      |                    |        |
|                |              |         |                  | Interaction | F <sub>2,535</sub> =5.5   | 0.004  |                      |                      |                    |        |
| 1D inset       | novel        | RO      | T-Test           | Environment | t(101)=2.56               | 0.012  |                      |                      |                    |        |
|                |              |         |                  |             |                           |        | <b>Fam vs Nov</b>    | <b>Nov vs Nov</b>    |                    |        |
| 1F (Pre-wean)  | novel-novel  | SC      | 3x1-ANOVA        | Environment | F <sub>(2,298)</sub> =70  | <0.001 | Tukey HSD (Env)      | <0.001               | 0.003              |        |
| 1F (Post-wean) |              |         | 3x1-ANOVA        | Environment | F <sub>(2,127)</sub> =33  | <0.001 |                      | <0.001               | 0.32               |        |
| 1G (Pre-wean)  |              | RO      | 3x1-ANOVA        | Environment | F <sub>(2,332)</sub> =15  | <0.001 | Tukey HSD (Env)      | <0.001               | 0.016              |        |
| 1G (Post-wean) |              |         | 3x1-ANOVA        | Environment | F <sub>(2,139)</sub> =12  | <0.001 |                      | <0.001               | 0.51               |        |
| 2B             | rEnv         | SC      | 2x3-ANOVA        | Age         | F <sub>2,420</sub> =90.64 | <0.001 | SME(Env)             | <0.001               | 0.033              | <0.001 |
|                |              |         |                  | Environment | F <sub>1,420</sub> =65.4  | <0.001 |                      |                      |                    |        |
|                |              |         |                  | Interaction | F <sub>2,420</sub> =3.19  | 0.042  |                      |                      |                    |        |
| 2B inset       | rEnv         | SC      | T-Test           | Environment | t(79)=4.78                | <0.001 |                      |                      |                    |        |
| 2D             | rEnv         | RO      | 2x3-ANOVA        | Age         | F <sub>2,421</sub> =2.79  | 0.062  | SME(Env)             | <0.001               | 0.15               | 0.012  |
|                |              |         |                  | Environment | F <sub>1,421</sub> =4.83  | 0.028  |                      |                      |                    |        |
|                |              |         |                  | Interaction | F <sub>2,421</sub> =5.73  | 0.003  |                      |                      |                    |        |
| 2D inset       | rEnv         | RO      | T-Test           | Environment | t(79)=1.06                | 0.29   |                      |                      |                    |        |
| 3B, left       | rWalls       | SC      | 2x3-ANOVA        | Age         | F <sub>2,227</sub> =52.55 | <0.001 | SME(Env)             | n/a                  | n/a                | n/a    |
|                |              |         |                  | Environment | F <sub>1,227</sub> =0.39  | 0.53   |                      |                      |                    |        |
|                |              |         |                  | Interaction | F <sub>2,227</sub> =0.94  | 0.39   |                      |                      |                    |        |
| 3B, left inset | rWalls       | SC      | T-Test           | Environment | t(10)=0.39                | 0.7    |                      |                      |                    |        |
| 3C, left       | rWalls       | RO      | 2x3-ANOVA        | Age         | F <sub>2,227</sub> =0.24  | 0.79   | SME(Env)             | n/a                  | n/a                | n/a    |
|                |              |         |                  | Environment | F <sub>1,227</sub> =0.76  | 0.39   |                      |                      |                    |        |
|                |              |         |                  | Interaction | F <sub>2,227</sub> =0.68  | 0.51   |                      |                      |                    |        |
| 3C, left inset | rWalls       | RO      | T-Test           | Environment | t(10)=0.87                | 0.4    |                      |                      |                    |        |
| 3E, left       | rFloor       | SC      | 2x3-ANOVA        | Age         | F <sub>2,400</sub> =27.47 | <0.001 | SME(Env)             | 0.3                  | 0.26               | 0.001  |
|                |              |         |                  | Environment | F <sub>1,400</sub> =13.68 | <0.001 |                      |                      |                    |        |
|                |              |         |                  | Interaction | F <sub>2,400</sub> =3.43  | 0.033  |                      |                      |                    |        |
| 3E, left inset | rFloor       | SC      | T-Test           | Environment | t(52)=0.34                | 0.74   |                      |                      |                    |        |
| 3F, left       | rFloor       | RO      | 2x3-ANOVA        | Age         | F <sub>2,406</sub> =1.26  | 0.29   | SME(Env)             | 0.67                 | 0.65               | <0.001 |
|                |              |         |                  | Environment | F <sub>1,406</sub> =2.88  | 0.09   |                      |                      |                    |        |
|                |              |         |                  | Interaction | F <sub>2,406</sub> =3.8   | 0.023  |                      |                      |                    |        |
| 3F, left inset | rFloor       | RO      | T-Test           | Environment | t(52)=0.23                | 0.82   |                      |                      |                    |        |
|                |              |         |                  |             |                           |        | <b>Fam vs rWalls</b> | <b>Fam vs rFloor</b> | <b>Fam vs rEnv</b> |        |
| 3G             | rW, rF, rEnv | SC      | 4x1-ANOVA        | Environment | F <sub>3,319</sub> =31.06 | <0.001 | Tukey HSD (Env)      | 0.9                  | 0.99               | <0.001 |
| 3G inset       | rW, rF, rEnv | SC      | 4x1-ANOVA        | Environment | F <sub>3,128</sub> =7.86  | <0.001 |                      | 0.92                 | 1                  | <0.001 |
| 3H             | rW, rF, rEnv | RO      | 4x1-ANOVA        | Environment | F <sub>3,322</sub> =6.04  | 0.001  |                      | 1                    | 0.78               | <0.001 |

**B**

| Spatial Correlation | pre-wean    |        | post-wean   |        | adult       |        |
|---------------------|-------------|--------|-------------|--------|-------------|--------|
|                     | t-statistic | p      | t-statistic | p      | t-statistic | p      |
| Novel               | t(108)=14.3 | <0.001 | t(45)=8.1   | <0.001 | t(66)=17.3  | <0.001 |
| rEnv                | t(74)=8.3   | <0.001 | t(49)=2.3   | 0.03   | t(76)=6.2   | <0.001 |
| rWalls              | t(44)=1.6   | 0.12   | t(33)=0.9   | 0.38   | t(34)=-0.46 | 0.65   |
| rFloor              | t(54)=1.3   | 0.22   | t(49)=1.5   | 0.14   | t(89)=5.4   | <0.001 |
| <b>Rate Overlap</b> |             |        |             |        |             |        |
| Novel               | t(118)=4.8  | <0.001 | t(54)=3.5   | <0.001 | t(68)=9.2   | <0.001 |
| rEnv                | t(74)=3.7   | <0.001 | t(49)=-1.6  | 0.13   | t(76)=1.6   | 0.11   |
| rWalls              | t(44)=0.2   | 0.87   | t(33)=-1.6  | 0.11   | t(34)=-0.5  | 0.6    |
| rFloor              | t(57)=0.6   | 0.57   | t(49)=-1.2  | 0.23   | t(91)=3.6   | <0.001 |

**C**

| Figure/Panel | Environment | Measure | Statistical Test | pre-wean  |        | post-wean |        |           |        |
|--------------|-------------|---------|------------------|-----------|--------|-----------|--------|-----------|--------|
|              |             |         |                  | statistic | p      | statistic | p      | statistic | p      |
| 1C           | novel       | SC      | 2-way KS-test    | 0.69      | <0.001 | 0.73      | <0.001 | 0.85      | <0.001 |
| 1E           | novel       | RO      | 2-way KS-test    | 0.37      | <0.001 | 0.45      | <0.001 | 0.65      | <0.001 |
| 2C           | rEnv        | SC      | 2-way KS-test    | 0.51      | <0.001 | 0.19      | 0.29   | 0.37      | <0.001 |
| 2E           | rEnv        | RO      | 2-way KS-test    | 0.37      | <0.001 | 0.17      | 0.41   | 0.24      | 0.012  |
| 3B, right    | rWalls      | SC      | 2-way KS-test    | 0.22      | 0.19   | 0.21      | 0.39   | 0.23      | 0.24   |
| 3C, right    | rWalls      | RO      | 2-way KS-test    | 0.13      | 0.79   | 0.18      | 0.61   | 0.15      | 0.8    |
| 3D, right    | rFloor      | SC      | 2-way KS-test    | 0.14      | 0.59   | 0.16      | 0.52   | 0.35      | <0.001 |
| 3E, right    | rFloor      | RO      | 2-way KS-test    | 0.16      | 0.45   | 0.11      | 0.9    | 0.25      | 0.003  |

**Supplemental Table 4.** Full statistical results, and numbers of cells recorded, for Figures 1-3 (A) Results for all parametric tests (ANOVAs and t-tests). The table shows detailed results of statistical analyses for all panels in Figures 1-3 in which data is plotted as mean±SEM. Factorial design of analysis (ANOVAs) is indicated in the ‘Statistical Test’ column. All main effects and interactions are indicated with respective F or t and p values. Simple Main Effects (SME) were used as post-hoc analyses for 2-way ANOVAs, Tukey’s Honest Significant Difference (Tukey HSD) was used as post-hoc analysis for 1-way ANOVAs. (B) Statistical analysis of same data as in (A) using paired sample t-tests, instead of ANOVAs. (C) Results for non-parametric tests comparing cumulative distribution functions (CDFs) for spatial correlation and rate overlap scores (Kolmogorov–Smirnov [KS] tests). Test statistics and p-values are indicated for all age groups and represent comparisons between average familiar trials (calculated across trials before any manipulations were run) and familiar vs environmental manipulations. p<0.05 are shown in red.

**D**

|               | Novel    |           |                                            |                    |         |
|---------------|----------|-----------|--------------------------------------------|--------------------|---------|
|               | mean age | N animals | N Sessions (1st exposure, Repeat exposure) | mean ensemble size | N Cells |
| Pre-weanling  | 18.9±1.4 | 11        | 17 (11, 6)                                 | 8.4±4.8            | 142     |
| Post-weanling | 23.6±2.5 | 9         | 10 (9, 1)                                  | 6.4±2.5            | 64      |
| Adult         | n/a      | 7         | 9 (7, 2)                                   | 10.2±5.4           | 92      |
|               | rEnv     |           |                                            |                    |         |
|               | mean age | N animals | N Sessions (1st exposure, Repeat exposure) | mean ensemble size | N Cells |
| Pre-weanling  | 18.4±1.5 | 13        | 20 (13, 7)                                 | 4.1±3.4            | 81      |
| Post-weanling | 25.9±2.4 | 7         | 10 (7, 3)                                  | 5.2±2.9            | 52      |
| Adult         | n/a      | 7         | 7 (7, 0)                                   | 13.1±3.8           | 92      |
|               | rWalls   |           |                                            |                    |         |
|               | mean age | N animals | N Sessions (1st exposure, Repeat exposure) | mean ensemble size | N Cells |
| Pre-weanling  | 19.4±1.2 | 6         | 7 (6, 1)                                   | 6.4±4              | 45      |
| Post-weanling | 26.1±2.8 | 5         | 7 (5, 2)                                   | 5±2.1              | 35      |
| Adult         | n/a      | 3         | 3 (3, 0)                                   | 13±6.1             | 39      |
|               | rFloor   |           |                                            |                    |         |
|               | mean age | N animals | N Sessions (1st exposure, Repeat exposure) | mean ensemble size | N Cells |
| Pre-weanling  | 18.5±1.7 | 12        | 15 (12, 3)                                 | 3.9±3.4            | 58      |
| Post-weanling | 25.9±2.3 | 6         | 9 (6, 3)                                   | 5.9±2.8            | 53      |
| Adult         | n/a      | 8         | 9 (8, 1)                                   | 11.2±4.1           | 101     |

**Supplemental Table 4, continued**

(D) Mean age (mean±SD), number of animals, number of recording sessions (showing also the number of first exposures for each animal and the number of repeat exposures), mean size of place cell ensembles (mean±SD) and numbers of total place cells recorded, for all environmental manipulations. The environmental manipulations used in this study included both the first exposure to each manipulation for each rat, as well as repeat exposures (see third column above). To confirm that there was no effect of the amount of experience in the manipulated environments, for the two conditions in which remapping occurred in young rats ('novel' and 'rEnv') the remapping scores were divided by whether they were obtained from a 1st exposure or repeat exposure, and a 2x2 ANOVA (Exposure: 1st, repeat; Age: pre-weanling, post-weanling) was run for each score and for each manipulation. For all ANOVAs, neither the Exposure main effect nor the Age\*Exposure interaction were significant. (Novel, SC: Exp,  $F(1,165)=0.57$ ,  $p=0.45$ ; Exp\*Age,  $F(1,165)=0.73$ ,  $p=0.39$ . Novel, RO: Exp,  $F(1,196)=2.16$ ,  $p=0.14$ ; Exp\*Age,  $F(1,196)=0.24$ ,  $p=0.62$ . rEnv, SC: Exp,  $F(1,126)=1.76$ ,  $p=0.19$ ; Exp\*Age,  $F(1,126)=0.08$ ,  $p=0.77$ . rEnv, RO: Exp,  $F(1,126)=0.14$ ,  $p=0.70$ ; Exp\*Age,  $F(1,126)=0.29$ ,  $p=0.59$ ).
